# Supplementary material for: Temporal profiling of changes in phosphatidylinositol 4,5-bisphosphate, inositol 1,4,5-trisphosphate and diacylglycerol allows comprehensive analysis of phospholipase C-initiated signalling in single neurons1
Source: PubMed Central journal article supplement (PMC2779467; doi:10.1111/j.1471-4159.2008.05587.x), 2008-11
Supplement: jnc0107-0602-SD1.pdf [file jnc0107-0602-SD1.pdf]

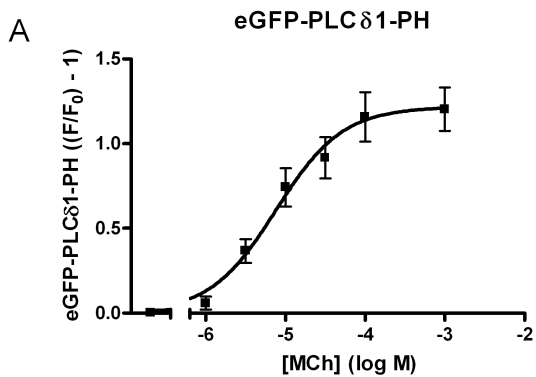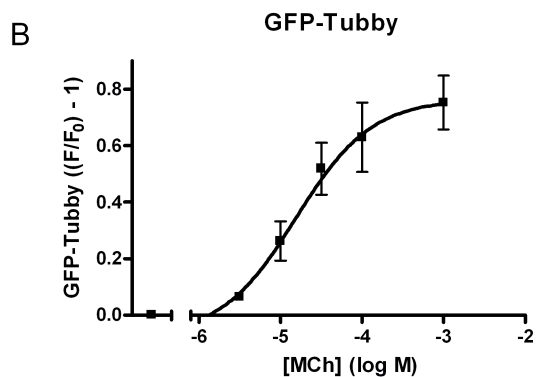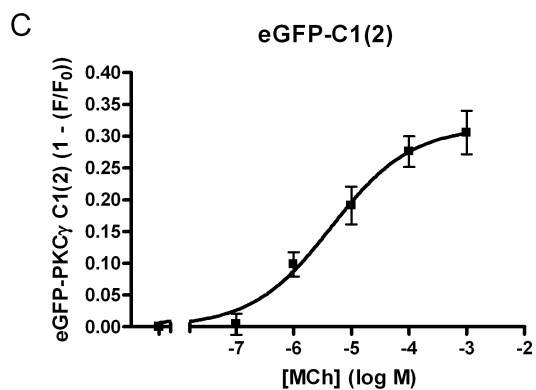

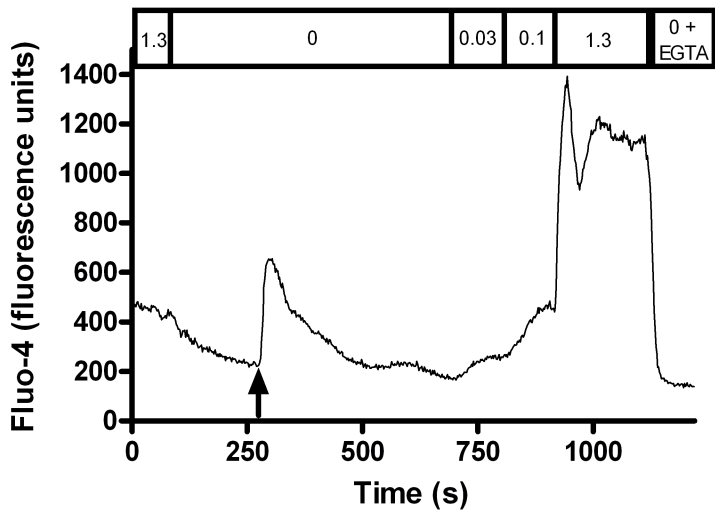

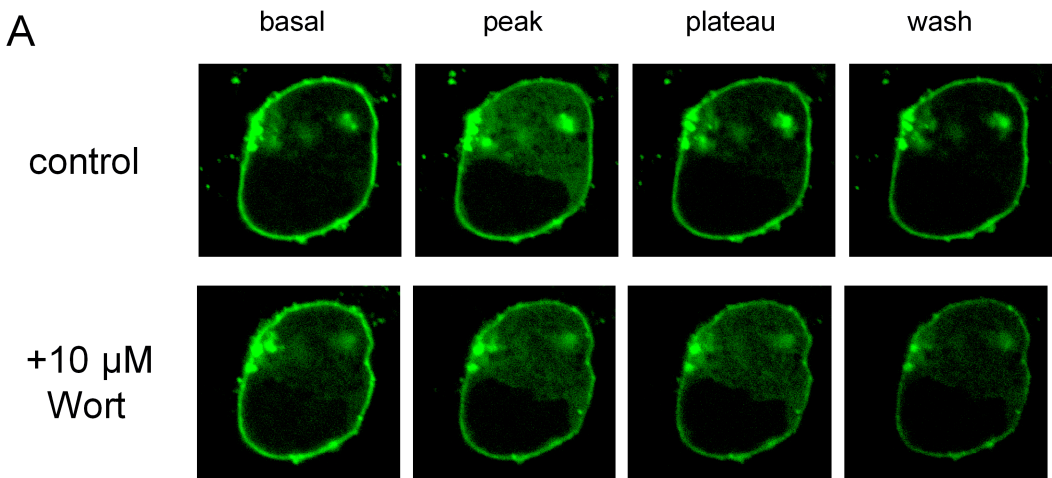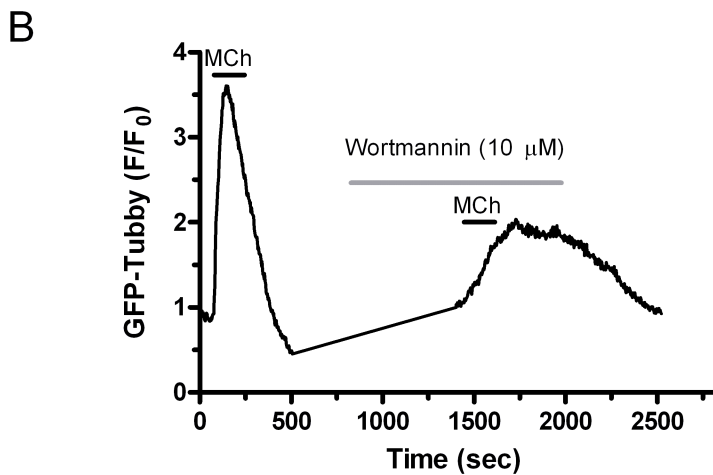

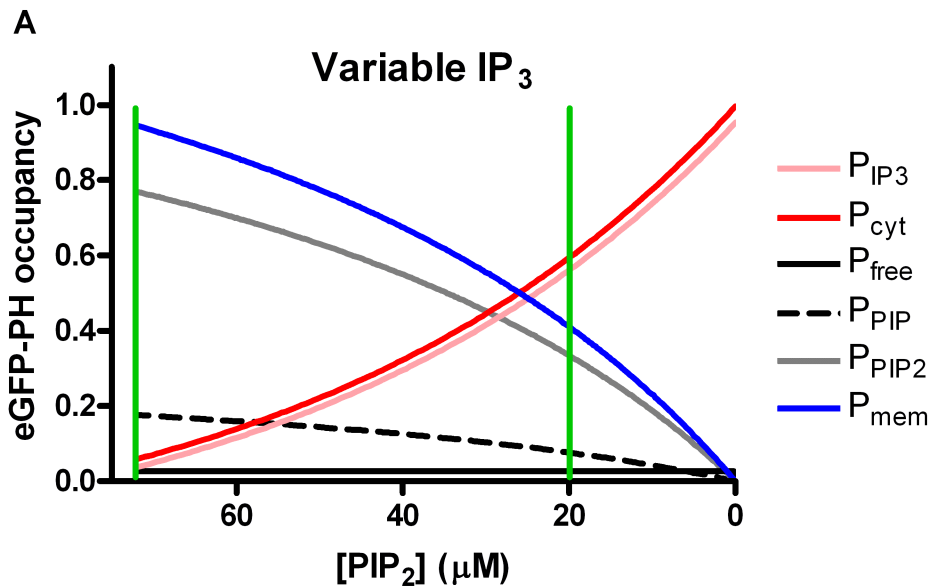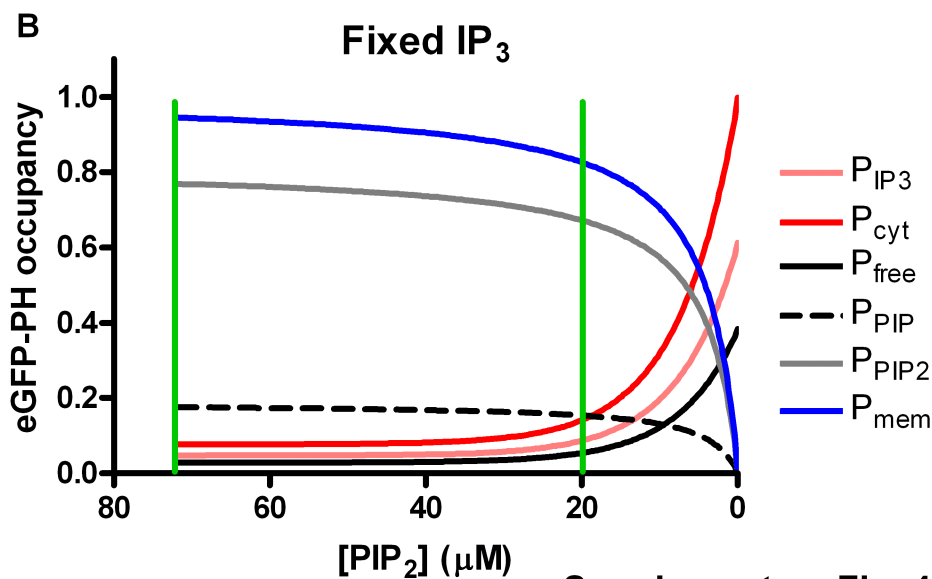

Supplementary Fig. 4

### Supplementary Table 1

Concentration-dependence and kinetics of GFP-labeled biosensor translocations in response to MCh in SH-SY5Y cells.

|                                | <b>eGFP-PH</b>  | <b>GFP-Tubby</b>   | <b>eGFP-C1(2)</b>    |
|--------------------------------|-----------------|--------------------|----------------------|
| <b>pEC<sub>50</sub> (M)</b>    | 5.19 ± 0.11 (9) | 4.53 ± 0.21 (5)*   | 4.89 ± 0.23 (6)      |
| <b>t<sub>10-90</sub> (sec)</b> | 39.2 ± 2.6 (35) | 58.8 ± 3.0 (30)*** | 30.8 ± 1.7 (48)††† ‡ |

Mean pEC<sub>50</sub> (negative log of the agonist concentration required to produce 50% of the maximal response) and t<sub>10-90</sub> (time ( in sec) between 10 and 90% of peak response to MCh (100 μM)) estimates for eGFP-PH, GFP-Tubby and eGFP-C1(2) translocation in SH-SY5Y cells in response to MCh. Differences between pEC<sub>50</sub> or t<sub>10-90</sub> estimates were determined by one-way ANOVA and Bonferroni's *post-hoc* test, with \* denoting differences between eGFP-PH and GFP-Tubby (\**P*<0.05; \*\*\**P*<0.001), † denoting differences between eGFP-C1(2) and GFP-Tubby (†††*P*<0.001) and ‡ denoting differences between eGFP-C1(2) and eGFP-PH (‡*P*<0.05).

## Supplementary Table 2

eGFP-PH and GFP-Tubby translocation in SH-SY5Y cells in response to MCh (1 mM), in the absence (control) and presence of wortmannin (Wort; 1 or 10  $\mu$ M) or LY294002 (LY; 100  $\mu$ M).

|                  | control             | + 1 $\mu$ M Wort    | control              | + 10 $\mu$ M Wort      | control             | + 100 $\mu$ M LY      |
|------------------|---------------------|---------------------|----------------------|------------------------|---------------------|-----------------------|
| <b>eGFP-PH</b>   |                     |                     |                      |                        |                     |                       |
| peak             | 3.38 $\pm$ 0.43 (8) | 3.60 $\pm$ 0.40 (8) | 3.77 $\pm$ 0.25 (14) | 2.97 $\pm$ 0.17 (14)*  | 3.69 $\pm$ 0.33 (6) | 2.46 $\pm$ 0.24 (6)*  |
| plateau          | -1.2 $\pm$ 4.9 (8)  | 4.7 $\pm$ 1.6 (8)   | 0.9 $\pm$ 2.6 (15)   | 43.5 $\pm$ 6.4 (15)**  | 0.4 $\pm$ 3.1 (6)   | 32.9 $\pm$ 6.7 (6)**  |
| <b>GFP-Tubby</b> |                     |                     |                      |                        |                     |                       |
| peak             | 2.33 $\pm$ 0.27 (9) | 2.69 $\pm$ 0.32 (9) | 2.97 $\pm$ 0.58 (9)  | 4.93 $\pm$ 0.67 (9)*   | 1.98 $\pm$ 0.29 (7) | 2.33 $\pm$ 0.22 (7)   |
| plateau          | -2.1 $\pm$ 2.8 (8)  | -6.0 $\pm$ 3.4 (8)  | 2.4 $\pm$ 4.9 (9)    | 78.9 $\pm$ 6.3 (10)*** | 1.3 $\pm$ 1.9 (7)   | 62.0 $\pm$ 4.2 (7)*** |

Data are expressed as means  $\pm$  s.e.m. (number of cells indicated in parentheses) for fold changes in cytosolic fluorescence over basal ( $F/F_0$ ) (for “peak” values) or percent of peak responses remaining 240 sec after peak (for “plateau” values). Differences between control and inhibitor-treated cells were determined by Student’s *t*-test (\* $P$ <0.05; \*\* $P$ <0.01; \*\*\* $P$ <0.001).

### Supplementary Table 3

eGFP-PH and GFP-Tubby translocation in cultured neonatal rat hippocampal neurons in response to MCh (1 mM), in the absence (control) and presence of wortmannin (Wort; 1 or 10  $\mu$ M).

|                  | Control              | + 1 $\mu$ M Wort     | + 10 $\mu$ M Wort      |
|------------------|----------------------|----------------------|------------------------|
| <b>eGFP-PH</b>   |                      |                      |                        |
| peak             | 3.33 $\pm$ 0.51 (26) | 2.69 $\pm$ 0.60 (12) | 2.78 $\pm$ 0.52 (11)   |
| plateau          | 5.3 $\pm$ 2.8 (26)   | 5.4 $\pm$ 3.9 (12)   | 6.2 $\pm$ 3.2 (11)     |
| <b>GFP-Tubby</b> |                      |                      |                        |
| peak             | 1.47 $\pm$ 0.08 (23) | 1.29 $\pm$ 0.05 (7)  | 1.54 $\pm$ 0.21 (11)   |
| plateau          | 1.4 $\pm$ 4.5 (23)   | 4.7 $\pm$ 3.6 (6)    | 35.8 $\pm$ 7.7 (11)*** |

Data are expressed as means  $\pm$  s.e.m. (number of cells indicated in parentheses) for fold changes in cytosolic fluorescence over basal ( $F/F_0$ ) (for “peak” values) or percent of peak responses remaining 240 sec after peak (for “plateau” values). Differences between control and inhibitor-treated cells were determined by one-way ANOVA and Bonferroni’s *post-hoc* test (\*\*\*) ( $P < 0.001$ ).
